# Supplementary material for: Th1 polarization defines the synovial fluid T cell compartment in oligoarticular juvenile idiopathic arthritis
Source: PubMed Central journal article supplement (PMC8492302; doi:10.1172/jci.insight.149185), 2021-09-22
Supplement: jciinsight-6-149185-s215.pdf [file jciinsight-6-149185-s215.pdf]

## SUPPLEMENTARY FIGURES

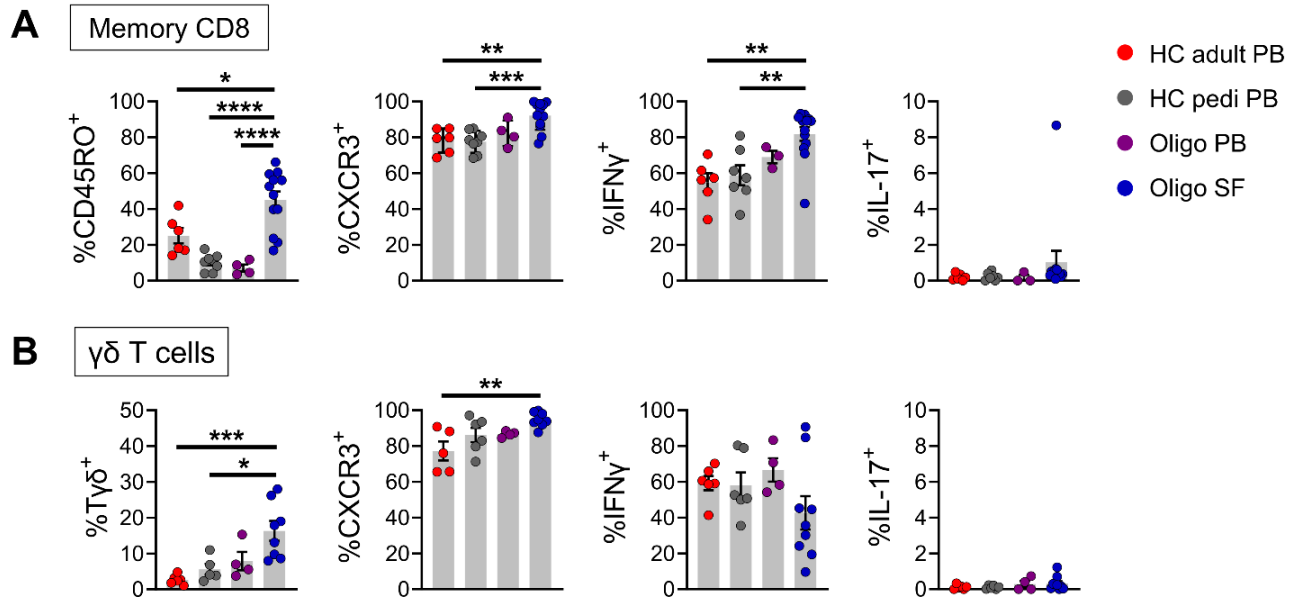

**Figure S1: CD8 memory T cells and  $\gamma\delta$  T cells are enriched in the SF of oligo JIA patients, and upregulate Th1 markers.**

A) Percent of total CD8<sup>+</sup> T memory (Tmem, CD3<sup>+</sup>CD8<sup>+</sup>CD45RO<sup>+</sup>) cells among total CD8<sup>+</sup> T cells and of CD8<sup>+</sup> Tmem expressing different cytokines and chemokines in the SF of oligo JIA patients (n=12-13) and in the PB of patients (n=3-4) and controls (adult: n=6, pediatric: n=7-8). B) Percent of total  $\gamma\delta$  T lymphocytes (CD3<sup>+</sup>T $\gamma\delta$ <sup>+</sup>) and of  $\gamma\delta$  T cells expressing different cytokines and chemokines in the SF of oligo JIA patients (n=8-9) and in the PB of patients (n=4) and controls (adult: n=5-6, pediatric: n=5-6). HC, healthy control; pedi, pediatric; oligo, oligoarticular juvenile idiopathic arthritis; PB, peripheral blood; SF, synovial fluid. Summary data on all bar graphs are mean  $\pm$  standard error. P-value <0.05 (\*); <0.01 (\*\*), <0.001 (\*\*\*), <0.0001 (\*\*\*\*). Statistical testing: one-way ANOVA followed by multiple t-tests with Turkey correction.

### A Paired oligo PB and SF samples

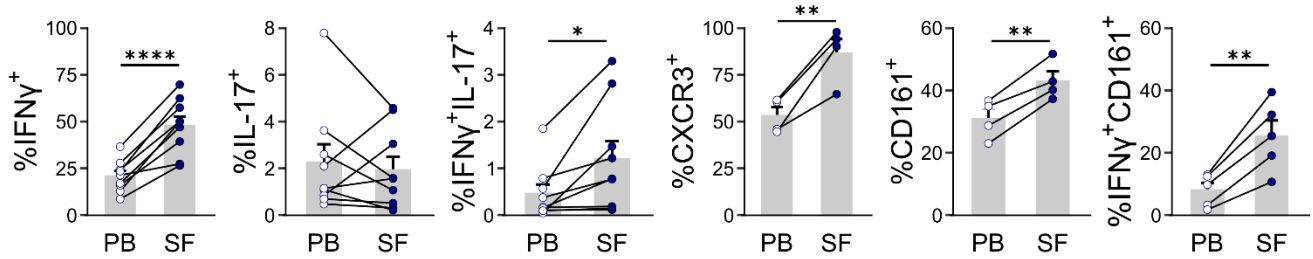

### B New-onset oligo SF vs. Chronic oligo SF

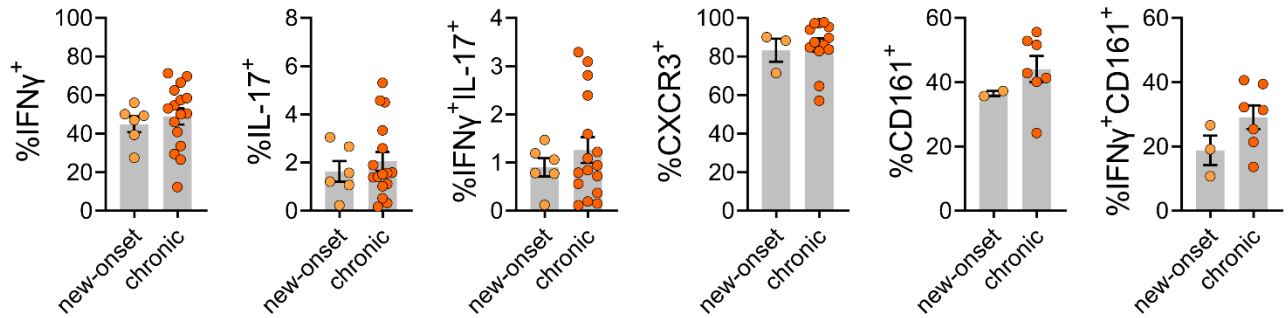

### C Persistent oligo SF vs. Extended oligo SF

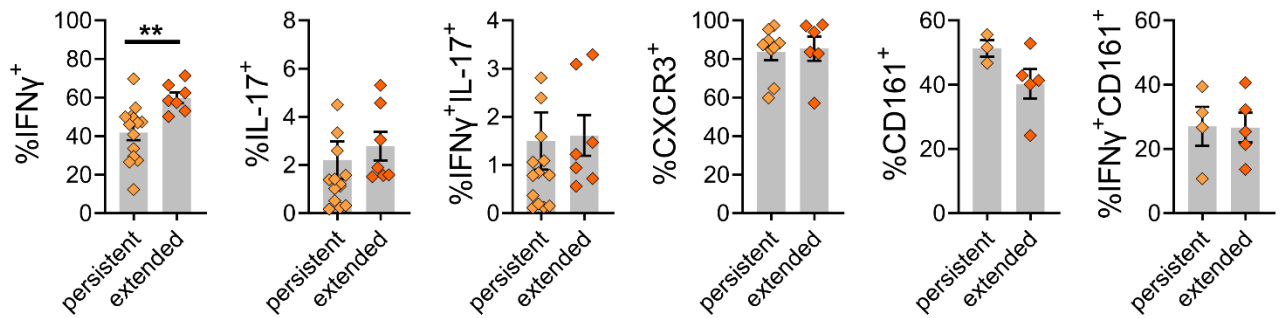

### D ANA- oligo SF vs. ANA+ oligo SF

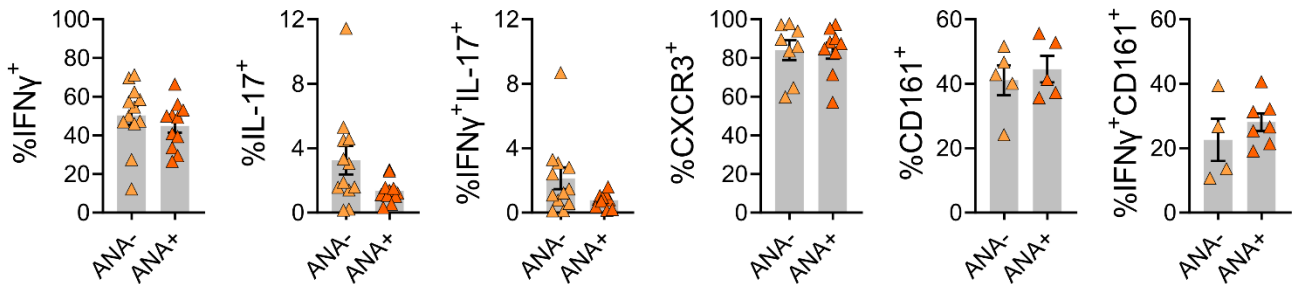

**Figure S2: Th1 polarization of CD4<sup>+</sup> Tmem cells in the SF of new-onset and chronic oligo JIA patients.** A) Percent of CD4<sup>+</sup> Tmem (CD3<sup>+</sup>CD4<sup>+</sup>CD45RO<sup>+</sup>) cells expressing different cytokines and chemokines in paired PB and SF samples from oligo JIA patients (n=4-9). B) Percent of CD4<sup>+</sup> Tmem cells expressing different cytokines and chemokines in oligo JIA SF samples obtained at disease onset (n=2-5) or in chronic disease phase (n=7-16). C) Percent of CD4<sup>+</sup> Tmem cells expressing different cytokines and chemokines in the SF of patients progressing to persistent (n=3-13) or extended (n=5-7) forms of oligo JIA. D) Percent of CD4<sup>+</sup> Tmem cells expressing different cytokines and chemokines in the SF of oligo JIA patients with (n=5-11) or without (n=4-12) antinuclear autoantibody (ANA). All analyses were gated on CD3<sup>+</sup>CD4<sup>+</sup>CD45RO<sup>+</sup> cells (CD4<sup>+</sup> Tmem). PB, peripheral blood; SF, synovial fluid; oligo, oligoarticular juvenile idiopathic arthritis; ANA, antinuclear autoantibody. Summary data on all bar graphs are mean ± standard error. P-value <0.05 (\*); <0.01 (\*\*), <0.001 (\*\*\*), <0.0001 (\*\*\*\*). Statistical testing: Paired (a) and unpaired (b and c) t-tests.

### A Paired oligo PB and SF samples

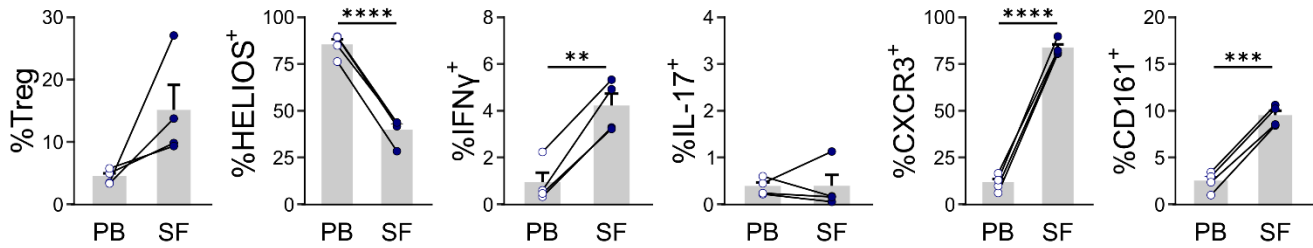

### B New-onset oligo SF vs. Chronic oligo SF

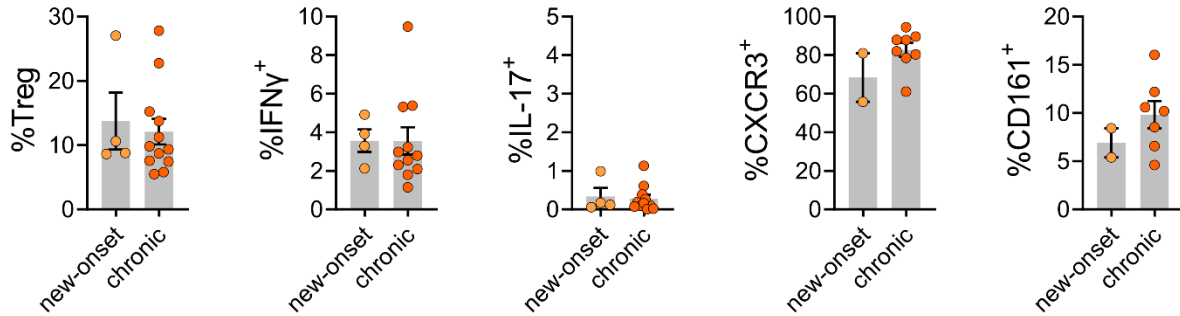

### C Persistent oligo SF vs. Extended oligo SF

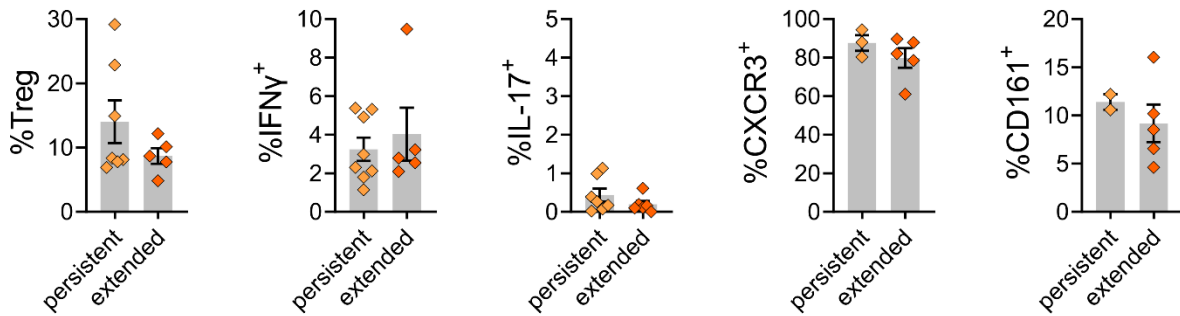

### D ANA- oligo SF vs. ANA+ oligo SF

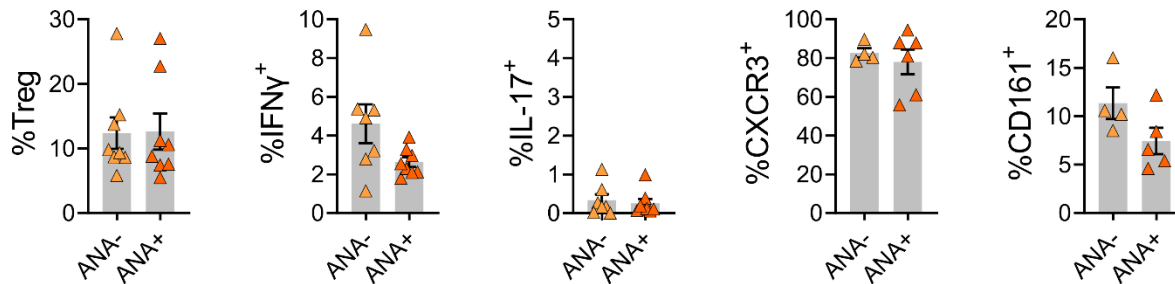

**Figure S3: Th1 polarization of regulatory T (Treg) cells in the SF of new-onset and chronic oligo JIA patients.** A) Percent of total Treg (CD25<sup>+</sup>CD127<sup>lo</sup>FOPX3<sup>+</sup>) among CD4<sup>+</sup> T cells, and of Treg cells expressing different cytokines and chemokines in paired PB and SF samples from oligo JIA patients (n=4). B) Percent of total Treg (CD25<sup>+</sup>CD127<sup>lo</sup>FOPX3<sup>+</sup>) among CD4<sup>+</sup> T cells, and of Treg cells expressing different cytokines and chemokines in oligo JIA SF samples obtained at disease onset (n=2-4) or in chronic disease phase (n=7-12). C) Percent of total Treg (CD25<sup>+</sup>CD127<sup>lo</sup>FOPX3<sup>+</sup>) among CD4<sup>+</sup> T cells and of Treg cells expressing different cytokines and chemokines in the SF of patients progressing to persistent (n=2-8) or extended (n=5) forms of oligo JIA. D) Percent of total Treg (CD25<sup>+</sup>CD127<sup>lo</sup>FOPX3<sup>+</sup>) among CD4<sup>+</sup> T cells and of Treg cells expressing different cytokines and chemokines in the SF of oligo JIA patients with (n=5-8) or without (n=4-8) antinuclear autoantibody (ANA). PB, peripheral blood; SF, synovial fluid; oligo, oligoarticular juvenile idiopathic arthritis; ANA, antinuclear autoantibody. Summary data on all bar graphs are mean  $\pm$  standard error. P-value <0.05 (\*); <0.01 (\*\*), <0.001 (\*\*\*), <0.0001 (\*\*\*\*). Statistical testing: Paired (a) and unpaired (b and c) t-tests.

**A**

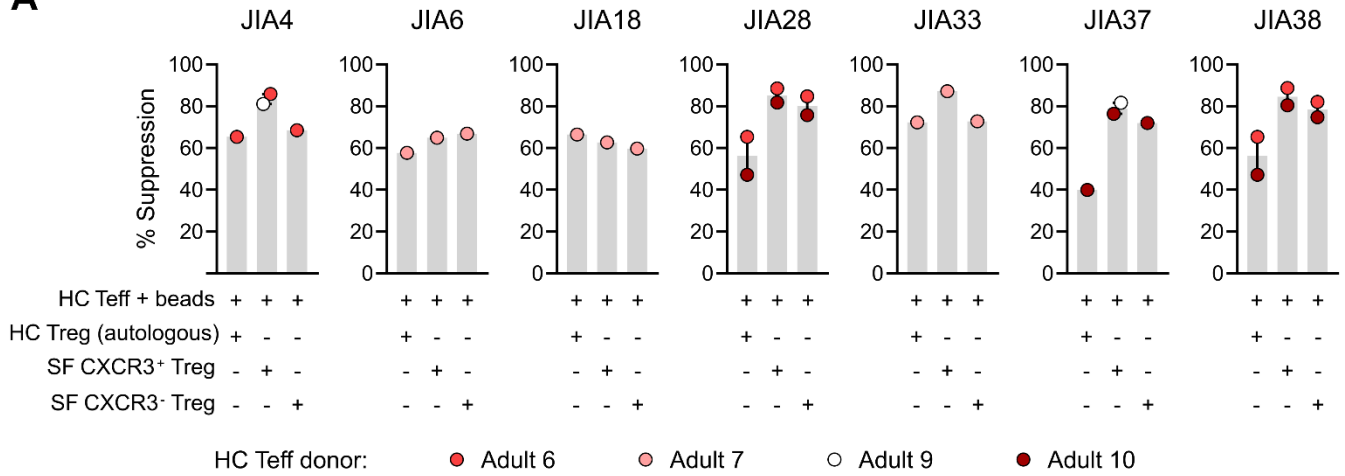

**B**

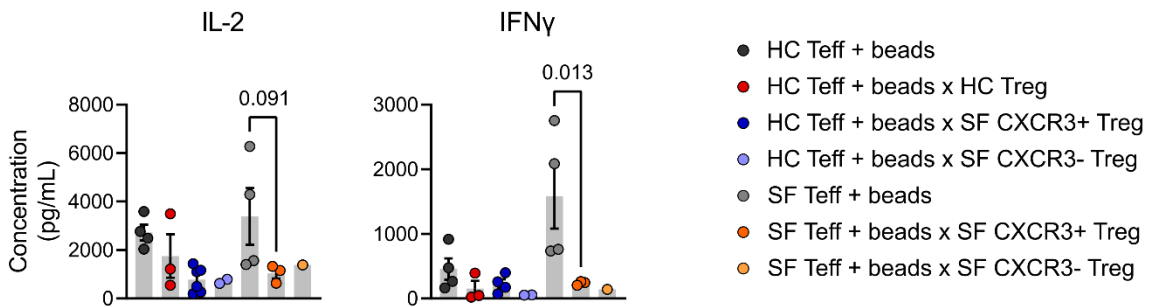

**Figure S4: Th1-like Tregs maintain the ability to suppress Teff proliferation and cytokine production.** A) Per patient percent suppression (mean  $\pm$  standard error) in the proliferation of Teff cells ( $CD4^+CD25^+$ ) from a third-party control after co-culture at a ratio of 1:1 with autologous PB Tregs ( $CD4^+CD25^+CD127^{lo}$ ), oligo JIA CXCR3<sup>+</sup> SF Tregs or oligo JIA CXCR3<sup>-</sup> SF Tregs. Given the small number of subjects in each experiment, statistical testing was not preformed. B) Cytokine concentration (pg/mL, mean  $\pm$  standard error) detected in the supernatant of suppression assay co-cultures. Teffs from healthy controls were stimulated with anti-CD2/CD3/CD28 beads alone or co-cultured at a ratio of 1:1 with autologous Tregs, oligo JIA CXCR3<sup>+</sup> SF Tregs, or oligo JIA CXCR3<sup>-</sup> SF Tregs. Similarly, oligo JIA SF Teffs were stimulated with beads and co-cultured at a ratio of 1:1 with autologous oligo JIA CXCR3<sup>+</sup> SF Tregs or oligo JIA CXCR3<sup>-</sup> SF Tregs. The depicted data represents 4 independent experiments conducted with 4 healthy controls and 5 oligo JIA patients. HC, healthy control; oligo, oligoarticular; JIA, juvenile idiopathic arthritis; PB, peripheral blood; SF, synovial fluid. Statistical testing: one-way ANOVA followed by selected t-tests with Turkey correction.

## SUPPLEMENTARY TABLES

**Table S1: Clinical Characteristics of the Study Participants and Samples Contributed to the Studies.**

| Subject         | Sample | Group   | JIA subtype |              | Sex | Age (yrs) |             | Joint involvement |             | ANA | Uveitis | Treatment at sampling | Flow | RNA-seq          | Other                    |
|-----------------|--------|---------|-------------|--------------|-----|-----------|-------------|-------------------|-------------|-----|---------|-----------------------|------|------------------|--------------------------|
|                 |        |         | at sampling | end of study |     | at onset  | at sampling | at onset          | at sampling |     |         |                       |      |                  |                          |
| Adult 1         | PB     | Control | NA          | NA           | F   | NA        | 24-25       | NA                | NA          | NA  | NA      | NA                    | Yes  | No               | No                       |
| Adult 2         | PB     | Control | NA          | NA           | F   | NA        | 24-25       | NA                | NA          | NA  | NA      | NA                    | Yes  | No               | No                       |
| Adult 3         | PB     | Control | NA          | NA           | M   | NA        | 35-36       | NA                | NA          | NA  | NA      | NA                    | Yes  | Bulk             | Suppr assay              |
| Adult 4         | PB     | Control | NA          | NA           | M   | NA        | 28          | NA                | NA          | NA  | NA      | NA                    | Yes  | No               | No                       |
| Adult 5         | PB     | Control | NA          | NA           | M   | NA        | 35          | NA                | NA          | NA  | NA      | NA                    | No   | Bulk             | No                       |
| Adult 6         | PB     | Control | NA          | NA           | F   | NA        | 26-28       | NA                | NA          | NA  | NA      | NA                    | Yes  | No               | Suppr assay, Methylation |
| Adult 7         | PB     | Control | NA          | NA           | F   | NA        | 35-36       | NA                | NA          | NA  | NA      | NA                    | Yes  | Bulk             | Suppr assay, Methylation |
| Adult 8         | PB     | Control | NA          | NA           | F   | NA        | 28-29       | NA                | NA          | NA  | NA      | NA                    | Yes  | Bulk             | No                       |
| Adult 9         | PB     | Control | NA          | NA           | M   | NA        | 36          | NA                | NA          | NA  | NA      | NA                    | Yes  | No               | Suppr assay, Methylation |
| Adult 10        | PB     | Control | NA          | NA           | F   | NA        | 22          | NA                | NA          | NA  | NA      | NA                    | No   | No               | Suppr assay              |
| Pedi 1          | PB     | Control | NA          | NA           | F   | NA        | 16          | NA                | NA          | NA  | NA      | NA                    | Yes  | Bulk             | No                       |
| Pedi 2          | PB     | Control | NA          | NA           | F   | NA        | 11.5        | NA                | NA          | NA  | NA      | NA                    | Yes  | Bulk             | No                       |
| Pedi 3          | PB     | Control | NA          | NA           | F   | NA        | 7           | NA                | NA          | NA  | NA      | NA                    | Yes  | Bulk             | No                       |
| Pedi 4          | PB     | Control | NA          | NA           | M   | NA        | 11          | NA                | NA          | NA  | NA      | NA                    | Yes  | Bulk             | No                       |
| Pedi 5          | PB     | Control | NA          | NA           | F   | NA        | 6           | NA                | NA          | NA  | NA      | NA                    | Yes  | Bulk             | No                       |
| Pedi 6          | PB     | Control | NA          | NA           | M   | NA        | 6.5         | NA                | NA          | NA  | NA      | NA                    | Yes  | No               | No                       |
| Pedi 7          | PB     | Control | NA          | NA           | M   | NA        | 7           | NA                | NA          | NA  | NA      | NA                    | Yes  | No               | No                       |
| Pedi 8          | PB     | Control | NA          | NA           | M   | NA        | 14          | NA                | NA          | NA  | NA      | NA                    | Yes  | No               | No                       |
| JIA 01          | PB, SF | Oligo   | Persistent  | Persistent   | F   | 4.5       | 9           | 2                 | 1           | -   | No      | ADA                   | Yes  | Single-cell (SF) | No                       |
| JIA 02          | PB, SF | Oligo   | New-onset   | Persistent   | F   | 2         | 2           | 1                 | 1           | +   | No      | None                  | No   | Bulk             | No                       |
| JIA 02 (repeat) | SF     | Oligo   | Persistent  | Persistent   | F   | 2         | 4           | 1                 | 1           | +   | No      | ETA                   | Yes  | Single-cell (SF) | No                       |
| JIA 03          | SF     | Oligo   | Persistent  | Persistent   | F   | 3.5       | 9           | 1                 | 1           | -   | No      | None                  | Yes  | No               | No                       |
| JIA 03 (repeat) | PB, SF | Oligo   | Persistent  | Persistent   | F   | 3.5       | 9.5         | 1                 | Unknown     | -   | No      | None                  | No   | Bulk             | No                       |
| JIA 04          | PB, SF | Oligo   | New-onset   | Persistent   | F   | 10        | 10          | 1                 | 1           | +   | No      | None                  | No   | Bulk             | No                       |
| JIA 04 (repeat) | SF     | Oligo   | Persistent  | Persistent   | F   | 10        | 13          | 1                 | 1           | +   | No      | MTX                   | Yes  | No               | No                       |
| JIA 04 (repeat) | SF     | Oligo   | Persistent  | Persistent   | F   | 10        | 16          | 1                 | 1           | +   | No      | MTX                   | No   | No               | Suppr assay              |

|                 |        |           |            |            |   |      |      |         |         |   |         |          |     |      |                            |
|-----------------|--------|-----------|------------|------------|---|------|------|---------|---------|---|---------|----------|-----|------|----------------------------|
| JIA 05          | PB, SF | Oligo     | Persistent | Extended   | F | 2.5  | 10   | 1       | 1       | - | No      | None     | No  | Bulk | No                         |
| JIA 05 (repeat) | PB, SF | Oligo     | Persistent | Extended   | F | 2.5  | 14.5 | 1       | 1       | - | No      | ETA      | Yes | No   | No                         |
| JIA 06          | PB, SF | Oligo     | New-onset  | Persistent | F | 13   | 13   | 1       | 1       | - | No      | None     | Yes | Bulk | Suppr assay                |
| JIA 07          | PB, SF | Oligo     | New-onset  | Persistent | F | 3.5  | 3.5  | 2       | 2       | - | No      | None     | No  | Bulk | No                         |
| JIA 08          | PB, SF | Oligo     | New-onset  | Persistent | F | 5    | 5    | 2       | 2       | - | Unknown | None     | Yes | No   | No                         |
| JIA 09          | PB     | Oligo     | New-onset  | Persistent | F | 1.8  | 1.8  | 1       | 1       | - | No      | None     | Yes | No   | No                         |
| JIA 10          | PB     | Oligo     | New-onset  | Persistent | F | 5    | 5    | 1       | 1       | - | No      | None     | Yes | No   | No                         |
| JIA 11          | PB     | Oligo     | New-onset  | Persistent | M | 4    | 4    | 5       | 5       | + | No      | MTX*     | Yes | No   | No                         |
| JIA 12          | PB     | Oligo     | New-onset  | Persistent | M | 4    | 4    | 1       | 1       | + | No      | None     | Yes | No   | No                         |
| JIA 13          | SF     | Oligo     | New-onset  | Persistent | F | 2.5  | 2.5  | 2       | 4       | + | Unknown | None     | Yes | No   | No                         |
| JIA 14          | PB     | Oligo     | New-onset  | Persistent | F | 2    | 2.5  | 1       | 1       | + | Yes     | MTX      | Yes | No   | No                         |
| JIA 15          | PB, SF | Oligo     | Persistent | Persistent | F | 2    | 12   | 2       | 1       | - | No      | MTX      | No  | Bulk | Methylation                |
| JIA 16          | PB, SF | Oligo     | Persistent | Persistent | F | 3    | 9    | 2       | 2       | + | No      | MTX      | Yes | Bulk | Methylation                |
| JIA 17          | PB, SF | Oligo     | Persistent | Persistent | F | 3.5  | 10   | 1       | 1       | - | Yes     | MTX      | Yes | Bulk | Methylation                |
| JIA 18          | SF     | Oligo     | Persistent | Persistent | F | 5.5  | 6    | 1       | 1       | + | No      | None     | Yes | No   | Suppr assay                |
| JIA 19          | SF     | Oligo     | Persistent | Persistent | F | 1    | 7    | Unknown | 2       | + | No      | None     | Yes | No   | No                         |
| JIA 20          | SF     | Oligo     | Persistent | Persistent | F | 4    | 10   | 1       | 1       | - | Yes     | None     | Yes | No   | No                         |
| JIA 21          | SF     | Oligo     | Persistent | Persistent | F | 2    | 4.5  | 2       | 2       | - | Yes     | None     | Yes | No   | Methylation                |
| JIA 22          | SF     | Oligo     | Persistent | Persistent | M | 5    | 6    | 1       | 1       | - | Unknown | None     | Yes | No   | No                         |
| JIA 23          | SF     | Oligo     | Persistent | Persistent | F | 13   | 15.5 | 1       | 1       | + | No      | None     | Yes | No   | No                         |
| JIA 24          | SF     | Oligo     | Persistent | Persistent | F | 6    | 11.5 | 1       | 2       | - | No      | None     | Yes | No   | No                         |
| JIA 25          | PB, SF | Oligo     | New-onset  | Extended   | M | 15.5 | 16   | 2       | 2       | + | No      | None     | No  | Bulk | No                         |
| JIA 26          | PB, SF | Oligo     | New-onset  | Extended   | F | 17   | 17   | 1       | 2       | - | No      | None     | Yes | Bulk | No                         |
| JIA 27          | PB, SF | Oligo     | Persistent | Extended   | F | 6    | 8.5  | 1       | 1       | - | No      | None     | Yes | No   | No                         |
| JIA 28          | SF     | Oligo     | Extended   | Extended   | F | 6    | 14.5 | 1       | 1       | - | No      | None     | Yes | No   | Suppr assay                |
| JIA 29          | SF     | Oligo     | Extended   | Extended   | F | 4    | 15   | 4       | 1       | + | Yes     | None     | Yes | No   | No                         |
| JIA 30          | SF     | Oligo     | Extended   | Extended   | M | 4    | 7    | 2       | 1       | - | No      | LEF, MTX | Yes | No   | No                         |
| JIA 31          | SF     | Oligo     | Extended   | Extended   | F | 8.5  | 12   | 4       | Unknown | + | No      | MTX      | Yes | No   | No                         |
| JIA 32          | PB, SF | Oligo     | New-onset  | Unknown    | F | 6    | 6.5  | 1       | 1       | - | No      | None     | No  | Bulk | No                         |
| JIA 33          | SF     | Oligo     | New-onset  | Unknown    | M | 2    | 2.5  | 3       | 3       | + | No      | None     | Yes | No   | Suppr assay<br>Methylation |
| JIA 34          | SF     | Oligo     | New-onset  | Unknown    | F | 13   | 13.5 | 1       | 1       | + | Unknown | None     | Yes | No   | No                         |
| JIA 35          | PB, SF | Psoriatic | Persistent | Psoriatic  | M | 2    | 4.5  | 1       | 1       | + | No      | None     | Yes | Bulk | No                         |
| JIA 36          | PB, SF | ERA       | Persistent | ERA        | F | 13   | 13.5 | 1       | 1       | - | No      | MTX      | No  | Bulk | No                         |
| JIA 37          | SF     | Oligo     | Persistent | Persistent | F | 2.5  | 8    | 1       | 2       | - | Yes     | MTX      | No  | No   | Suppr assay                |
| JIA 38          | SF     | Oligo     | Persistent | Persistent | F | 3    | 7.5  | 1       | 2       | ? | No      | None     | No  | No   | Suppr assay                |

NA, not applicable; PB, peripheral blood; SF, synovial fluid; Oligo, oligoarticular; ERA, enthesitis-related arthritis; JIA, juvenile idiopathic arthritis; F, female; M, male; yrs, years; ADA, adalimumab; ETA, etanercept; LEF, leflunomide; MTX, methotrexate; ANA, antinuclear antibodies; Suppr, suppression. \*jointly with systemic steroids.

**Table S2: Antibodies and dyes used in flow cytometry staining.**

| Antibody or dye                           | Clone   | Manufacturer   | Catalog #  | Staining      |
|-------------------------------------------|---------|----------------|------------|---------------|
| anti-CD4-FITC                             | RPA-T4  | BD Biosciences | 555346     | Surface       |
| anti-CD25-PE                              | BC96    | eBioscience    | 12-0259-42 | Surface       |
| anti-CD127-PE/Cy7                         | A019D5  | BioLegend      | 351320     | Surface       |
| anti-CD45RO-FITC                          | UCHL1   | BioLegend      | 304204     | Surface       |
| anti-CD3-APC                              | UCHT1   | eBioscience    | 17-0038-42 | Surface       |
| anti-CD3-PE/Cy7                           | OKT3    | BioLegend      | 317334     | Surface       |
| anti-CD4-PE                               | OKT4    | BioLegend      | 317410     | Surface       |
| anti-CD8-APC/Cy7                          | RPA-T8  | BioLegend      | 301015     | Surface       |
| anti-Tgd-FITC                             | B1.1    | BioLegend      | 11-9959-42 | Surface       |
| anti-CXCR3-Pacific Blue                   | G025H7  | BioLegend      | 353724     | Surface       |
| anti-CXCR3-BV605                          | G025H7  | BioLegend      | 353728     | Surface       |
| anti-CD161-BV605                          | HP-3G10 | BioLegend      | 339916     | Surface       |
| anti-CTLA4-APC                            | L3D10   | BioLegend      | 349908     | Intracellular |
| anti-Helios-PerCp/Cy5.5                   | 22F6    | BioLegend      | 137230     | Intracellular |
| anti-Helios-APC/eFluor780                 | 22F6    | eBioscience    | 47-9883-42 | Intracellular |
| anti-FOXP3-pacific blue                   | PCH101  | Invitrogen     | 48-4776-42 | Intracellular |
| anti-IFN $\gamma$ -APC                    | 4S.B3   | BioLegend      | 502512     | Intracellular |
| anti-IL-17A-PerCp/Cy5.5                   | BL168   | BioLegend      | 512314     | Intracellular |
| LIVE/DEAD™ Fixable Yellow Dead Cell Stain | NA      | Invitrogen     | L34959     | Dead cells    |

**Table S3: Location of CpG sites analyzed in methylations studies.**

| Locus        | Region                                           | Position*      | CpG count |
|--------------|--------------------------------------------------|----------------|-----------|
| <i>FOXP3</i> | Treg-specific demethylation region (CNS2 region) | -2330 to -2263 | 9         |
| <i>CTLA4</i> | Exon 2                                           | 2651 to 2757   | 5         |
| <i>IKZF2</i> | Intron 4                                         | 27732 to 27748 | 3         |
| <i>IKZF4</i> | Intron 5                                         | 1969 to 2083   | 2         |
| <i>IL2RA</i> | Intron 1                                         | 24448 to 24517 | 4         |

\* Positions are specified counting from the ATG translation start codon.

**Table S4: Significant hits in independent Gene Set Enrichment Analyses (GSEA) of SF Tregs versus PB Tregs and SF Teffs versus PB Teffs.** Tregs (CD4<sup>+</sup>CD25<sup>+</sup>CD127<sup>lo</sup>) and Teffs (CD4<sup>+</sup>CD25<sup>-</sup>) were sorted from paired SF and PB samples of JIA patients (n=14) and from the PB of pediatric (n=5) and adult (n=4) controls for bulk RNA-sequencing. The normalized enrichment score (NES), adjusted p-value and q-values as estimated by clusterProfiler are reported for significantly enriched pathways or gene sets, ranked from highest to lowest NES in the SF Treg compartment. DESeq2-estimated and rank-corrected log2 fold changes (LFC) in gene expression values served as input for a cutoff-free GSEA, run in R with clusterProfiler version 3.14.3. GSEA compared sequencing data to the Reactome database (immune system and metabolism subsets), the human Treg gene set described in Ferraro (2014) and the mouse peripheral/induced Treg gene set described in Hill (2007). n.s., not significant.

| Pathway ID    | Pathway or Gene set description                              | NES (Teff) | NES (Treg) | P-value (Teff) | P-value (Treg) | Q-values (Teff) | Q-values (Treg) |
|---------------|--------------------------------------------------------------|------------|------------|----------------|----------------|-----------------|-----------------|
| Treg_UP       | Treg signature (Ferraro, 2014) - upregulated genes           | 2.734      | 2.538      | 0.00329        | 0.00297        | 0.00265         | 0.00207         |
| R-HSA-6783783 | Interleukin-10 signaling                                     | 2.325      | 2.532      | 0.00329        | 0.00297        | 0.00265         | 0.00207         |
| R-HSA-2132295 | MHC class II antigen presentation                            | 2.092      | 2.505      | 0.00329        | 0.00297        | 0.00265         | 0.00207         |
| R-HSA-877300  | Interferon gamma signaling                                   | 2.162      | 2.503      | 0.00329        | 0.00297        | 0.00265         | 0.00207         |
| R-HSA-909733  | Interferon alpha/beta signaling                              | 2.002      | 2.402      | 0.00329        | 0.00297        | 0.00265         | 0.00207         |
| R-HSA-913531  | Interferon Signaling                                         | 2.115      | 2.357      | 0.00329        | 0.00297        | 0.00265         | 0.00207         |
| R-HSA-1236978 | Cross-presentation of soluble exogenous antigens (endosomes) | n.s.       | 2.277      | n.s.           | 0.00297        | n.s.            | 0.00207         |
| R-HSA-350562  | Regulation of ornithine decarboxylase (ODC)                  | n.s.       | 2.269      | n.s.           | 0.00297        | n.s.            | 0.00207         |
| R-HSA-389948  | PD-1 signaling                                               | 2.264      | 2.234      | 0.00329        | 0.00297        | 0.00265         | 0.00207         |
| R-HSA-6798695 | Neutrophil degranulation                                     | 1.932      | 2.227      | 0.00329        | 0.00297        | 0.00265         | 0.00207         |
| R-HSA-202427  | Phosphorylation of CD3 and TCR zeta chains                   | 2.209      | 2.192      | 0.00329        | 0.00297        | 0.00265         | 0.00207         |
| R-HSA-449147  | Signaling by Interleukins                                    | 1.987      | 2.164      | 0.00329        | 0.00297        | 0.00265         | 0.00207         |
| R-HSA-202430  | Translocation of ZAP-70 to Immunological synapse             | 2.175      | 2.134      | 0.00329        | 0.00297        | 0.00265         | 0.00207         |
| R-HSA-202424  | Downstream TCR signaling                                     | 1.585      | 2.106      | 0.02621        | 0.00297        | 0.02113         | 0.00207         |
| R-HSA-202403  | TCR signaling                                                | 1.508      | 2.081      | 0.04549        | 0.00297        | 0.03667         | 0.00207         |
| R-HSA-202433  | Generation of second messenger molecules                     | 1.750      | 2.065      | 0.03377        | 0.00297        | 0.02722         | 0.00207         |
| R-HSA-5668541 | TNFR2 non-canonical NF-kB pathway                            | n.s.       | 2.046      | n.s.           | 0.00297        | n.s.            | 0.00207         |
| R-HSA-388841  | Costimulation by the CD28 family                             | 1.967      | 2.029      | 0.00329        | 0.00297        | 0.00265         | 0.00207         |
| R-HSA-351202  | Metabolism of polyamines                                     | n.s.       | 2.001      | n.s.           | 0.00297        | n.s.            | 0.00207         |
| R-HSA-5669034 | TNFs bind their physiological receptors                      | n.s.       | 1.995      | n.s.           | 0.00297        | n.s.            | 0.00207         |
| R-HSA-1236974 | ER-Phagosome pathway                                         | n.s.       | 1.925      | n.s.           | 0.00297        | n.s.            | 0.00207         |
| R-HSA-6785807 | Interleukin-4 and Interleukin-13 signaling                   | 1.543      | 1.916      | 0.04465        | 0.00297        | 0.03599         | 0.00207         |
| R-HSA-1236975 | Antigen processing-Cross presentation                        | n.s.       | 1.877      | n.s.           | 0.00443        | n.s.            | 0.00308         |
| R-HSA-446652  | Interleukin-1 family signaling                               | 1.514      | 1.821      | 0.03886        | 0.00297        | 0.03133         | 0.00207         |
| R-HSA-1169091 | Activation of NF-kappaB in B cells                           | n.s.       | 1.821      | n.s.           | 0.00894        | n.s.            | 0.00622         |
| R-HSA-2160916 | Hyaluronan uptake and degradation                            | n.s.       | 1.800      | n.s.           | 0.02123        | n.s.            | 0.01477         |



|               |                                                                          |       |       |         |         |         |         |
|---------------|--------------------------------------------------------------------------|-------|-------|---------|---------|---------|---------|
| R-HSA-193368  | Synthesis of bile acids and bile salts via 7alpha-hydroxycholesterol     | n.s.  | 1.795 | n.s.    | 0.02333 | n.s.    | 0.01623 |
| R-HSA-198933  | Immunoregulatory interactions between a Lymphoid and a non-Lymphoid cell | 1.686 | 1.789 | 0.00329 | 0.00443 | 0.00265 | 0.00308 |
| R-HSA-622312  | Inflammasomes                                                            | n.s.  | 1.788 | n.s.    | 0.02368 | n.s.    | 0.01647 |
| R-HSA-1168372 | Downstream signaling events of B Cell Receptor (BCR)                     | n.s.  | 1.785 | n.s.    | 0.00894 | n.s.    | 0.00622 |
| R-HSA-447115  | Interleukin-12 family signaling                                          | 1.678 | 1.761 | 0.03245 | 0.01554 | 0.02616 | 0.01081 |
| R-HSA-9020591 | Interleukin-12 signaling                                                 | 1.831 | 1.747 | 0.00828 | 0.02367 | 0.00667 | 0.01646 |
| R-HSA-9020702 | Interleukin-1 signaling                                                  | n.s.  | 1.745 | n.s.    | 0.00621 | n.s.    | 0.00432 |
| R-HSA-5676590 | NIK-->noncanonical NF-kB signaling                                       | n.s.  | 1.742 | n.s.    | 0.01554 | n.s.    | 0.01081 |
| R-HSA-449836  | Other interleukin signaling                                              | n.s.  | 1.729 | n.s.    | 0.03297 | n.s.    | 0.02293 |
| R-HSA-918233  | TRAF3-dependent IRF activation pathway                                   | n.s.  | 1.726 | n.s.    | 0.04085 | n.s.    | 0.02842 |
| R-HSA-197264  | Nicotinamide salvaging                                                   | n.s.  | 1.724 | n.s.    | 0.03665 | n.s.    | 0.02549 |
| R-HSA-193775  | Synthesis of bile acids and bile salts via 24-hydroxycholesterol         | n.s.  | 1.721 | n.s.    | 0.04123 | n.s.    | 0.02868 |
| R-HSA-189445  | Metabolism of porphyrins                                                 | n.s.  | 1.721 | n.s.    | 0.03665 | n.s.    | 0.02549 |
| R-HSA-192105  | Synthesis of bile acids and bile salts                                   | n.s.  | 1.718 | n.s.    | 0.03725 | n.s.    | 0.02591 |
| R-HSA-1630316 | Glycosaminoglycan metabolism                                             | n.s.  | 1.712 | n.s.    | 0.00780 | n.s.    | 0.00542 |
| R-HSA-390918  | Peroxisomal lipid metabolism                                             | n.s.  | 1.706 | n.s.    | 0.03725 | n.s.    | 0.02591 |
| R-HSA-77289   | Mitochondrial Fatty Acid Beta-Oxidation                                  | n.s.  | 1.703 | n.s.    | 0.03297 | n.s.    | 0.02293 |
| R-HSA-6803157 | Antimicrobial peptides                                                   | 2.002 | 1.701 | 0.00329 | 0.04070 | 0.00265 | 0.02831 |
| R-HSA-193807  | Synthesis of bile acids and bile salts via 27-hydroxycholesterol         | n.s.  | 1.701 | n.s.    | 0.04800 | n.s.    | 0.03339 |
| R-HSA-933541  | TRAF6 mediated IRF7 activation                                           | n.s.  | 1.689 | n.s.    | 0.04315 | n.s.    | 0.03002 |
| R-HSA-8956321 | Nucleotide salvage                                                       | n.s.  | 1.689 | n.s.    | 0.04315 | n.s.    | 0.03002 |
| R-HSA-211976  | Endogenous sterols                                                       | n.s.  | 1.687 | n.s.    | 0.04315 | n.s.    | 0.03002 |
| R-HSA-5607764 | CLEC7A (Dectin-1) signaling                                              | n.s.  | 1.680 | n.s.    | 0.00780 | n.s.    | 0.00542 |
| pTreg_DN      | induced/peripheral Treg (Hill, 2007) - downregulated genes               | n.s.  | 1.662 | n.s.    | 0.00297 | n.s.    | 0.00207 |
| R-HSA-8956319 | Nucleobase catabolism                                                    | n.s.  | 1.655 | n.s.    | 0.04845 | n.s.    | 0.03370 |
| R-HSA-2162123 | Synthesis of Prostaglandins (PG) and Thromboxanes (TX)                   | n.s.  | 1.654 | n.s.    | 0.06257 | n.s.    | 0.04352 |
| R-HSA-2871837 | FCERI mediated NF-kB activation                                          | n.s.  | 1.651 | n.s.    | 0.01554 | n.s.    | 0.01081 |
| R-HSA-70263   | Gluconeogenesis                                                          | n.s.  | 1.645 | n.s.    | 0.05211 | n.s.    | 0.03625 |
| R-HSA-2142845 | Hyaluronan metabolism                                                    | n.s.  | 1.642 | n.s.    | 0.06086 | n.s.    | 0.04234 |
| R-HSA-2029482 | Regulation of actin dynamics for phagocytic cup formation                | n.s.  | 1.641 | n.s.    | 0.02333 | n.s.    | 0.01623 |
| R-HSA-8978868 | Fatty acid metabolism                                                    | n.s.  | 1.641 | n.s.    | 0.00453 | n.s.    | 0.00315 |
| R-HSA-844456  | The NLRP3 inflammasome                                                   | n.s.  | 1.636 | n.s.    | 0.06257 | n.s.    | 0.04352 |
| R-HSA-15869   | Metabolism of nucleotides                                                | n.s.  | 1.620 | n.s.    | 0.01554 | n.s.    | 0.01081 |
| R-HSA-428157  | Sphingolipid metabolism                                                  | n.s.  | 1.611 | n.s.    | 0.02207 | n.s.    | 0.01535 |
| R-HSA-5607761 | Dectin-1 mediated noncanonical NF-kB signaling                           | n.s.  | 1.604 | n.s.    | 0.03281 | n.s.    | 0.02282 |

|               |                                                                |        |        |         |         |         |         |
|---------------|----------------------------------------------------------------|--------|--------|---------|---------|---------|---------|
| R-HSA-71387   | Metabolism of carbohydrates                                    | n.s.   | 1.586  | n.s.    | 0.00297 | n.s.    | 0.00207 |
| R-HSA-983705  | Signaling by the B Cell Receptor (BCR)                         | n.s.   | 1.584  | n.s.    | 0.01408 | n.s.    | 0.00980 |
| R-HSA-5621481 | C-type lectin receptors (CLRs)                                 | n.s.   | 1.583  | n.s.    | 0.01408 | n.s.    | 0.00980 |
| R-HSA-936440  | Negative regulators of DDX58/IFIH1 signaling                   | n.s.   | 1.580  | n.s.    | 0.06879 | n.s.    | 0.04785 |
| R-HSA-451927  | Interleukin-2 family signaling                                 | 1.878  | 1.575  | 0.00582 | 0.05351 | 0.00469 | 0.03723 |
| R-HSA-983169  | Class I MHC mediated antigen processing & presentation         | n.s.   | 1.530  | n.s.    | 0.00297 | n.s.    | 0.00207 |
| R-HSA-211945  | Phase I - Functionalization of compounds                       | n.s.   | 1.530  | n.s.    | 0.05351 | n.s.    | 0.03723 |
| R-HSA-2029480 | Fcgamma receptor (FCGR) dependent phagocytosis                 | n.s.   | 1.500  | n.s.    | 0.04315 | n.s.    | 0.03002 |
| R-HSA-1169410 | Antiviral mechanism by IFN-stimulated genes                    | n.s.   | 1.476  | n.s.    | 0.05466 | n.s.    | 0.03802 |
| R-HSA-1428517 | The citric acid (TCA) cycle and respiratory electron transport | n.s.   | 1.469  | n.s.    | 0.02207 | n.s.    | 0.01535 |
| R-HSA-983168  | Antigen processing: Ubiquitination & Proteasome degradation    | n.s.   | 1.460  | n.s.    | 0.00890 | n.s.    | 0.00619 |
| R-HSA-8957322 | Metabolism of steroids                                         | n.s.   | 1.459  | n.s.    | 0.03794 | n.s.    | 0.02639 |
| R-HSA-1483257 | Phospholipid metabolism                                        | n.s.   | 1.390  | n.s.    | 0.04315 | n.s.    | 0.03002 |
| R-HSA-71291   | Metabolism of amino acids and derivatives                      | -2.205 | -2.135 | 0.00329 | 0.00297 | 0.00265 | 0.00207 |
| Treg_DN       | Treg signature (Ferraro, 2014) - downregulated genes           | -1.850 | -2.277 | 0.00582 | 0.00297 | 0.00469 | 0.00207 |
| R-HSA-2408522 | Selenoamino acid metabolism                                    | -2.974 | -3.124 | 0.00329 | 0.00297 | 0.00265 | 0.00207 |
| R-HSA-2408557 | Selenocysteine synthesis                                       | -3.089 | -3.218 | 0.00329 | 0.00297 | 0.00265 | 0.00207 |
| R-HSA-9008059 | Interleukin-37 signaling                                       | 1.757  | n.s.   | 0.04062 | n.s.    | 0.03274 | n.s.    |
| R-HSA-196757  | Metabolism of folate and pterines                              | -1.901 | n.s.   | 0.00329 | n.s.    | 0.00265 | n.s.    |
